# Supplementary material
Source: PubMed Central journal article supplement (PMC3247957)
Supplement: supp_M111.278184_jbc.M111.278184-1.pdf [file supp_M111.278184_jbc.M111.278184-1.pdf]

## SUPPLEMENTAL TABLE LEGENDS

**TABLE S-I** Oligonucleotide probes used for Northern blot analysis for detecting sRNAs in G3 and G3-based gene silencing transfectants.

**TABLE S-II** Primers used for plasmid construction for G3:5'STIRP and G3:3'STIRP.

**TABLE S-III** Primers used for generation of PCR probes for Northern blots.

**TABLE S-IV** IDT probes used for FISH experiments.

**TABLE S-V** PCR primers for CHIP analysis.

## SUPPLEMENTAL FIGURE LEGENDS

**Fig. S1A:** G3 strain is silenced for Ap-A, AP-B and SAPLIP 1 genes. Northern blot analysis detects expression of all three genes in HM-1:IMSS but not in G3 parasites. The blot was loaded with 15µg total RNA sample from *E. histolytica* trophozoites of HM-1:IMSS or G3 strain and probed with each specific oligonucleotide probe as shown under each blot. Methylene blue staining is shown as a loading control.

**Fig. S1B:** Northern blot analysis detects antisense sRNAs for Ap-B and SAPLIP-1 in G3 parasites. The Northern blot (same as in Fig. 1B) is probed for oligonucleotide probes specific to Ap-B and SAPLIP 1 as shown under each blot.

**Fig. S1C:** Equal loading for three parallel blots. As in Fig. 1B, the three identical parallel blots were made with each blot loaded with 20µg sRNA enriched sample from *E. histolytica* trophozoites of HM-1:IMSS or G3 strain. These three blots were probed for a previously identified endogenous small RNA using probe EHS-D-A16-1, which showed equal signal for HM-1:IMSS and G3 in all three blots. Methylene blue staining is shown as a loading control.

**Fig. S1D:** Sequence alignment between Ap-A and Ap-B. The oligonucleotide probe AP-B sense probe 1 was derived from a region divergent between the two genes, indicated in blue.

**Fig. S1E:** Sequence alignment between Ap-A and SAPLIP-1. The oligonucleotide probe SAPLIP 1 sense probe 1 was derived from a region divergent between the two genes, indicated in pink.

**Fig. S2:** Antisense sRNAs to the silenced EhROM1, and EhSTIRP genes in G3 parasites have 5'-polyphosphate termini. Biochemical analysis of the 5' termini of antisense sRNAs to the silenced EhROM1, and EhSTIRP genes shows that they are resistant to treatment with Terminator enzyme and can be capped with a single G, and hence likely have 5' polyphosphate termini. The control probe was susceptible to Terminator enzyme and did not cap with capping enzyme, confirming its 5'-monophosphate structure.

**Fig. S3:** Western blot detects EhAGO2-2 using an anti-EhAGO2-2 antibody. Custom anti-EhAGO2-2 antibody recognizes a band of 110 kDa in lysate from both untransfected HM-1:IMSS and HM-1:IMSS/pKT3M-MycAgo2-2. Anti-Myc antibody only recognizes a band of 110 kDa in HM-1:IMSS/pKT3M-MycAgo2-2 but not in the non-transfected HM-1:IMSS parasites.

**Fig. S4:** Argonaute protein EhAGO2-2 is primarily localized in the parasite nucleus. IFAs using an anti-Myc antibody showed no signal for the control parasites HM-1:IMSS but a clear nuclear signal for the stable transfectants with Myc tagged EhAGO2-2 (pKT3M-MycAGO2-2).

**Fig. S5:** Quantitation of enrichment after CHIP with anti-Histone H3 and anti-EhAGO2-2 at the silenced gene loci in G3:ROM(KD) and G3:5'STIRP by CHIP analysis. The enrichment for each gene primer pair was calculated relative to the control gene primer pairs in whole cell extract (WCE). For G3:ROM(KD), STIRP is normalized to one. For G3:5'STIRP, EhROM1 is normalized to one. EhRpl21 has been used as a control for both samples.

**TABLE S-I Oligos used for Northern blot analysis for detecting sRNAs in G3 and G3-based gene silencing transfectants.**

| Oligo name        | Targeting gene                              | Orientation | Sequence                                   |
|-------------------|---------------------------------------------|-------------|--------------------------------------------|
| <b>Ap-A</b>       |                                             |             |                                            |
| S1                | Ap-A                                        | Sense       | ATGAAAGCCATCGTCTTTGTTTTAATCTTCGCTGTTGCTT   |
| S3                | Ap-A                                        | Sense       | CCTTTGCACTGGACTTATTAACACACTTGAAAACCTCCTT   |
| S5                | Ap-A                                        | Sense       | GCCTTTGCAATAAAGCCTCAGGATTCATTGCTACTCTTTG   |
| S7                | Ap-A                                        | Sense       | CTTATTGAAGACAAAGTTGATGCCAATGCTATTTGTGCTA   |
| AS1               | Ap-A                                        | Antisense   | AAGCAACAGCGAAGATTAACAAAGACGATGGCTTTCAT     |
| AS3               | Ap-A                                        | Antisense   | AAGGAGGTTTTCAAGTGTGTTAATAAGTCCAGTGCAAAGG   |
| US1S              | Ap-A                                        | Sense       | ATCACCGTGAATTATTTAAAGAGTAGGTTGAAAAC TACAA  |
| US1AS             | Ap-A                                        | Sense       | TTGTAGTTTTCAACCTACTCTTTAAATAATTCACGGTGAT   |
| SINE1-AS          | SINE1                                       | Antisense   | CAGATAATAACTGGGAGAGTCGAAGTATGAATTTGTACTAG  |
| SINE1-S           | SINE1                                       | Sense       | CTAGTACAAATTCATACTTCGACTCTCCCAGTTATTATCTG  |
| 5UTRS             | Ap-A                                        | Sense       | AAACATATCTTACAAACAATC                      |
| 5UTRAS            | Ap-A                                        | Antisense   | GATTGTTTGTAAGATATGTTT                      |
| 3UTRS             | Ap-A                                        | Sense       | TTTAAGCTACTCAATTGAGTAAATTTTCATAC           |
| DS1               | Ap-A                                        | Sense       | CTTTCTTTAAATAAAGAAAAGATATAAAATATGAAATAAA   |
| <b>EhROM1</b>     |                                             |             |                                            |
| RS-86             | EhROM1                                      | Sense       | ATTCTCCACCACATAACAATATACATACATTT           |
| RS1               | EhROM1                                      | Sense       | ATGGATGATGATAGAGAACCAACACCTACTTCAACAGCTAAA |
| RS168             | EhROM1                                      | Sense       | TCACATAGGTATTGTTTAGCACTATTTTCAGCAAGTTTTATG |
| RS471             | EhROM1                                      | Sense       | TTCAGATTTTTGATTGTTTATTTTTGTT               |
| <b>EhSTIRP</b>    |                                             |             |                                            |
| SS1               | EhSTIRP1                                    | Sense       | ATGATTATTATTAATCTACTCTTTCTTTTT             |
| SS624             | EhSTIRP1                                    | Sense       | ACAACAAAAAGATGTTGTTGTAAGTGT                |
| SS1028            | EhSTIRP1                                    | Sense       | ATATACCCTTGGAGAATCTTTA                     |
| SS2520            | EhSTIRP1                                    | Sense       | AATGGAGGATCTACTATTCATCTTA                  |
| SS6188            | EhSTIRP1                                    | Sense       | ATGAGAATCACAGGAGTGACGTTAAAT                |
| SS6342            | EhSTIRP1                                    | Sense       | AGCCATTGGTTGAAGTAGAAGGAAA                  |
| SS6501            | EhSTIRP1                                    | Sense       | AGAAATAGAAGGAAATAGGAGTGATGAAGA             |
| SS6801            | EhSTIRP1                                    | Sense       | AAAAACATGTCCATGTTTCAGGAGATAAGTG            |
| <b>Ap-B</b>       |                                             |             |                                            |
| Ap-B S            | Ap-B                                        | Sense       | TGTTGATGGTGCTCAAGCTGTTAGACAA               |
| Ap-B AS           | Ap-B                                        | Antisense   | TTGTCTAACAGCTTGAGCACCATCAACA               |
| <b>SAPLIP 1</b>   |                                             |             |                                            |
| SAPLIP 1 S        | SAPLIP 1                                    | Sense       | TGGCCTTATCGTAAATAAAGGT                     |
| SAPLIP 1 AS       | SAPLIP 1                                    | Antisense   | ACCTTTATTTACGATAAGGCCA                     |
| <b>tRNA probe</b> | tRNA-encoding array unit G <sup>^</sup> GCC | Antisense   | TGGTGCACTTGCCGGGAAACGAACCCGG               |
| <b>U5 snRNA</b>   | U5 snRNA gene                               | Antisense   | GGCGAAAGATAAGATCGATTTTGTTAG                |

**TABLE S-II Primers used for plasmid construction for G3:5'STIRP and G3:3'STIRP.**

| Construct  | Primer | Sequence                             |
|------------|--------|--------------------------------------|
| G3:5'STIRP | F      | AGGCCTATGATTATTATTAATCTACTCTTTCTTTTT |
|            | R      | GAGCTCTGACTGTTGACAATCAGGTTCT         |
| G3:3'STIRP | F      | AGGCCTTGAGAATCACAGGAGTGACGTT         |
|            | R      | GAGCTCTGTTCTGAAACCTCTACTCGAC         |

**TABLE S-III Primers used for generation of PCR probes for Northern blot.**

| Gene  | F/R | Sequence                |
|-------|-----|-------------------------|
| STIRP | F   | GCCATTGGTTGAAGTAGAAGG   |
|       | R   | GAACATTTGCTTCAACTCCTTTT |
| Ap-A  | F   | TTATTTGTATGAAGTTATTTG   |
|       | R   | TTAAACAAAACAAATAGTTG    |
| Actin | F   | GGGAGACGAAGAAGTTCAAGC   |
|       | R   | GGCAAGAATTGATCCTCCA     |

**TABLE S-IV IDT probes used for FISH experiments.**

| Gene       | Orientation | Sequence                                         |
|------------|-------------|--------------------------------------------------|
| Ap-A FAM   | Sense       | /56-FAM/ATGAAAGCCATCGTCTTTGTTTAAATCTTCGCTGTTGCTT |
| EhROM1 FAM | Sense       | /56-FAM/CTCCACCACATAACAATATACATACATTTGATTGGAGTAA |

**TABLE S-V PCR primers for CHIP analysis.**

| <b>gene</b> | <b>F/R</b> | <b>Sequence</b>           |
|-------------|------------|---------------------------|
| Ap-A        | F          | AAACAATCATGAAAGCCATCG     |
|             | R          | GCTTTATTGCAAAGGCTGC       |
| Ap-B        | F          | TTGCTGCAACAAGAGAAGGA      |
|             | R          | TGTCTAACAGCTTGAGCACCA     |
| SAPLIP 1    | F          | TTTCTTTTGCAGTTGCTGGA      |
|             | R          | CCATCAGCCTTACCACAAAGA     |
| EhROM1      | F          | GGGAGACATGAGGTTTCGAGT     |
|             | R          | GGTGAACATGGTGGTGGAAAT     |
| EhRPL21     | F          | CTAACGGTAGAAATAGAAGAACCAG |
|             | R          | TCCAAACACGTCCAGTCTTTC     |
| 5'STIRP     | F          | TGGTGAAATTAAGTTAAGCTTGG   |
|             | R          | TGTGAATCAATAATCAGTGGACAA  |

Fig. S1A

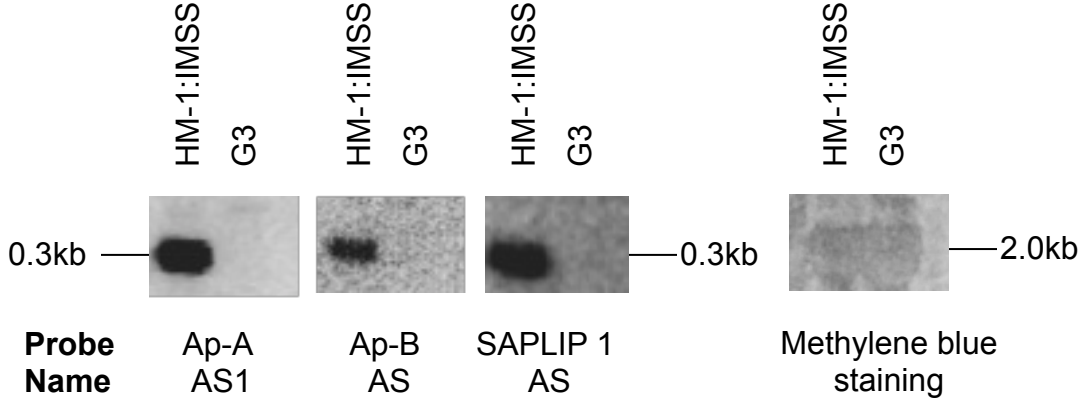

Fig. S1B

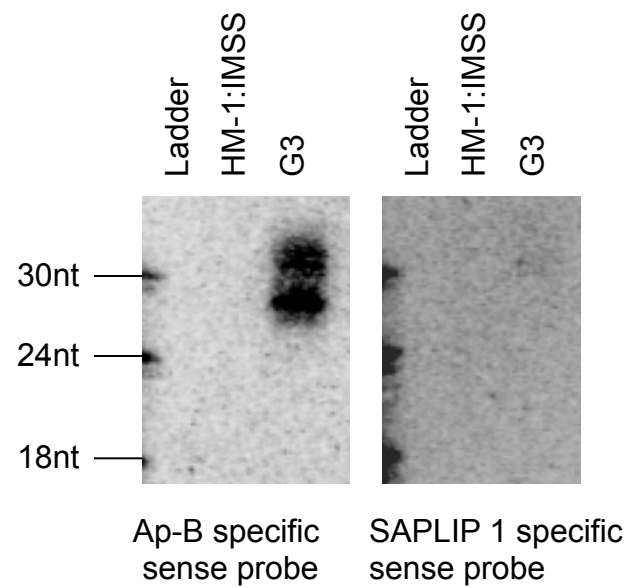

Fig. S1C

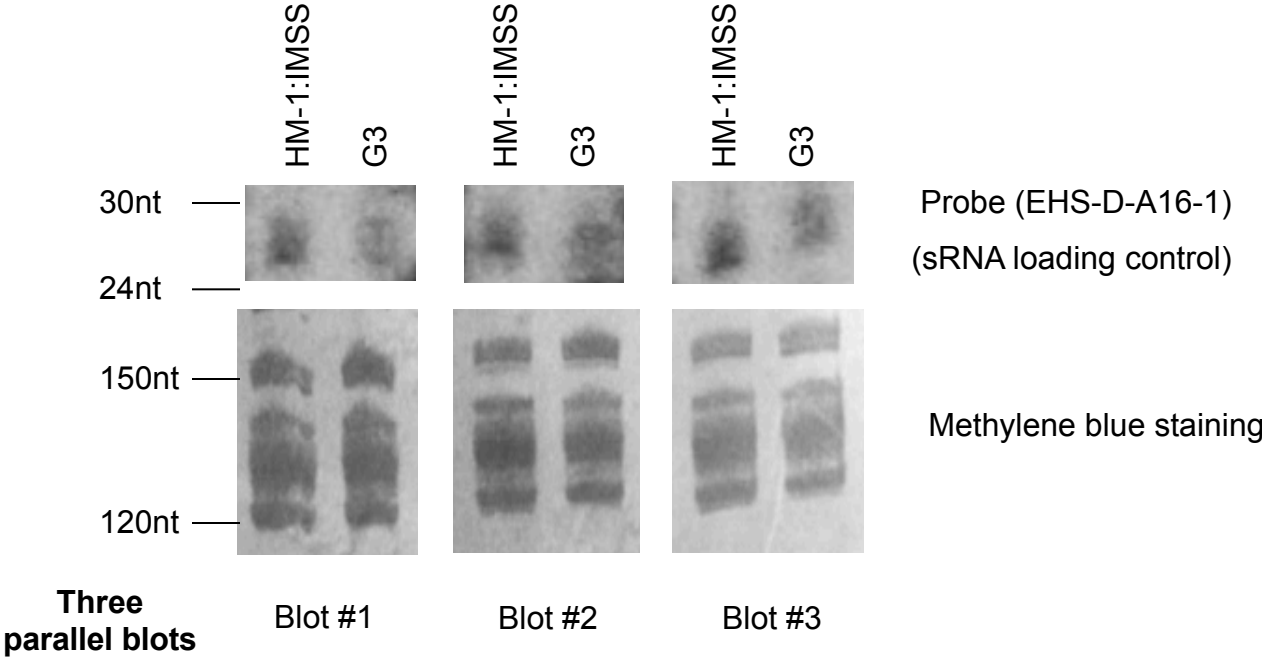

# Fig. S1D

## Sequence alignment for Ap-A and Ap-B

CLUSTAL 2.0.12 multiple sequence alignment

```
Ap-A      ATCACCGTGAATTATTTAAAG-AGTAGGTTGAAAACACAAAAACATATCTTA-CAAACA 58
Ap-B      -----GATGGTATTTAAACTAATAAAATGAACTAAATTATCAATTGTTTAAATCAAATT 53
          ***** * ** **** * * * * * * * * * *
Ap-A      ATCATGAAAAGCCATCGTCTTTGTTTTAATCCTTCGCTGTTGCTTTTGCAGTCACTGCTACT 118
Ap-B      ATTATGAGAGCTATTATCTTTGTTTTAATCCTTTGCTATTGCCTTTGC-----TGCAACA 107
          ** ***** ** * * ***** ***** ** ***** ***** **
Ap-A      CACCAAGGAGAAATCCTCTGCAACCTTTCGACTGGACTTATTAACACACTTGAAAACCTC 178
Ap-B      AGAGAAGGAGCTATTCTTTGCAATCTTTGTAAAGATACAGTTAAACTTGTGAAAACCTT 167
          ***** ** * * ***** ***** * * ***** *****
Ap-A      CTTACCACTAAGGGAGCTGATAAAGTAAAAGATTACATTAGCAGCCTTTCGCAATAAAGCC 238
Ap-B      TTAACTGTTGATGGTGCTCAAGCTGTTAGACAATATATCGACAACCTTGTGGTAAAGCT 227
          * ** * * * * * * * * * * * * * * * * * * * * * * * * * *
Ap-A      TCAGGATTCATTGCTACTCTTTGCACTAAAGTTCCTTGATTTTGGAAATGATAAACTCATC 298
Ap-B      AGTGGATTCCTTGGAACTCTTTGTGAAAAAATCCTTTCATTTGGTGTGATGAACTTGTC 287
          ***** ** ***** ** * * * * * * * * * * * * * * * *
Ap-A      CAACTTATTGAAGACAAAGTTGATGCCAATGCTATTTGTGCTAAGATTCATGCTTGCTAA 358
Ap-B      AAGCTTATTGAAAATCATGTTGACCCAGTCGTTGTTTGCGAAAAGATTCACGCTTGTTAA 347
          * ***** * * ***** * * * * * * * * * * * * * * * *
Ap-A      GTT---TTAAGCTACTCAATTGAGTAAAT-TTTCATACTTTCTTTATGTTTTTTTTTATTC 414
Ap-B      GTGAAGTCAAAATGATTAATTCAATCATTTGTTTTATTCTTTTTTCTATTAATATTTTT 407
          ** * * * * * * * * * * * * * * * * * * * * * * * * * *
Ap-A      TCTTTC----- 420
Ap-B      ATTTTTATAAATA 420
          ***
```

**Ap-B specific  
sense probe 1**



# Fig. S1E

## Sequence alignment for Ap-A and SAPLIP 1

CLUSTAL 2.0.12 multiple sequence alignment

Ap-A ATCACCGTGAATTATTTAAAGAGTAGGTTGAAAAC TACAAAACATATCTTACAAACAAT 60  
SAPLIP-1 -----

Ap-A CATGAAAGCCATCGTCTTTGTTTTAATCTTCGCTGTTGCTTTTGCAGTCACTGCTACTCA 120  
SAPLIP-1 -ATGAGAGCATTCTTATTGTCTTATTA-----ATTCTTTTGCAGTTGCTG----- 46  
\*\*\*\* \*\* \* \* \*\*\*\* \*\* \* \*\* \*\*\*\*

Ap-A CCAAGGAGAAATCCTCTGCAACCTTTCGACTGGACTTATTAACACACTTGAAAACCTCCT 180  
SAPLIP-1 -----GACCAATTGTTGCAACCTTTCGATTGGACTTGTTAATACCCTTGA TGGCCTTAT 101  
\*\* \*\* \* \*\*\*\* \* \*\*\*\* \*\* \*\* \*\* \*\* \*\* \*

Ap-A TACCACTAAGGGAGCTGATAAAGTAAAAGATTACATTAGCAGCCTTTCGCAATAAAGCCTC 240  
SAPLIP-1 CGTAAATAAAGG TCTGATAGAGTAAAAATTATATTGATGATCTTTCGTTGGTAAGGCTGA 161  
\* \*\* \*\* \*\*\*\* \* \*\*\*\* \*\* \*\* \* \*\* \* \*\* \*\*

Ap-A AGGATTCATTGCTACTCTTTCGACTAAAGTTCTTGATTTTGGATTGATAAACTCATCCA 300  
SAPLIP-1 TGGATTTATTGCTCAGCTCTGTGAAAACTTCTTTCATTTGGACTTGATAAACTTATTGA 221  
\*\*\*\*\* \*\*\*\*\* \*\* \*\* \*\*\* \*\*\*\* \*\*\*\*\* \*\*\*\*\* \*\*\*\* \*

Ap-A ACTTATTGAAGACAAAGTTGATGCCAATGCTATTTGTGCTAAGATTCATGCTTGCTAAGT 360  
SAPLIP-1 TCTTATTCAAAGTAAAGTAGATCCCTAATGCAATTTGTGCTCAAATGAATGCTTGCTAA-- 279  
\*\*\*\*\* \*\* \*\*\*\* \* \*\*\*\* \*\*\*\* \* \*\* \*\*\*\*\*

Ap-A TTTAAGCTACTCAATTGAGTAAATTTTCATACTTCTTTTATGTTTTTTTTTATTCCTTTC 420  
SAPLIP-1 -----

**SAPLIP 1 specific  
sense probe 1**

Fig. S2

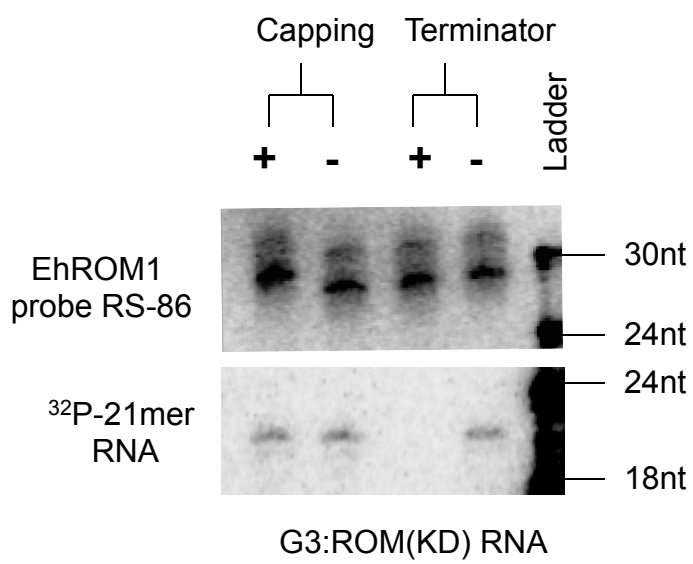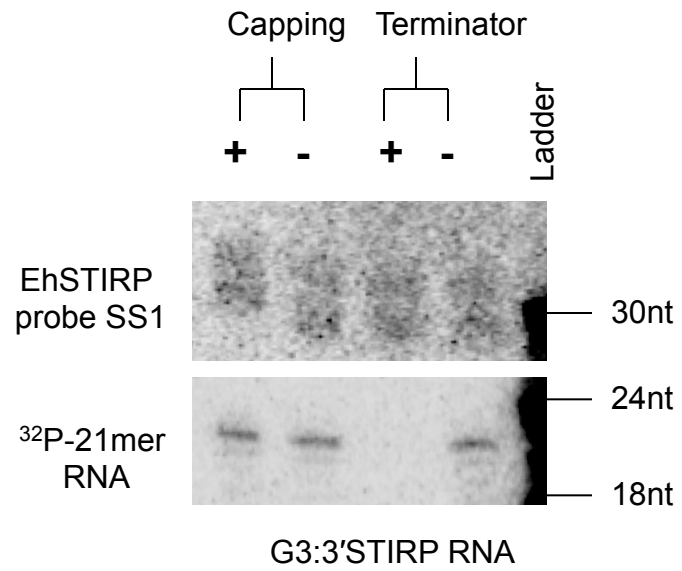

Fig. S3

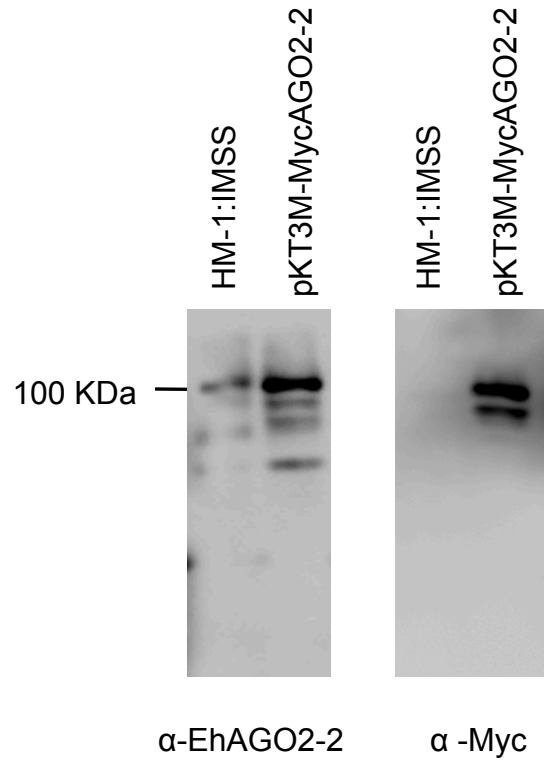

Fig. S4

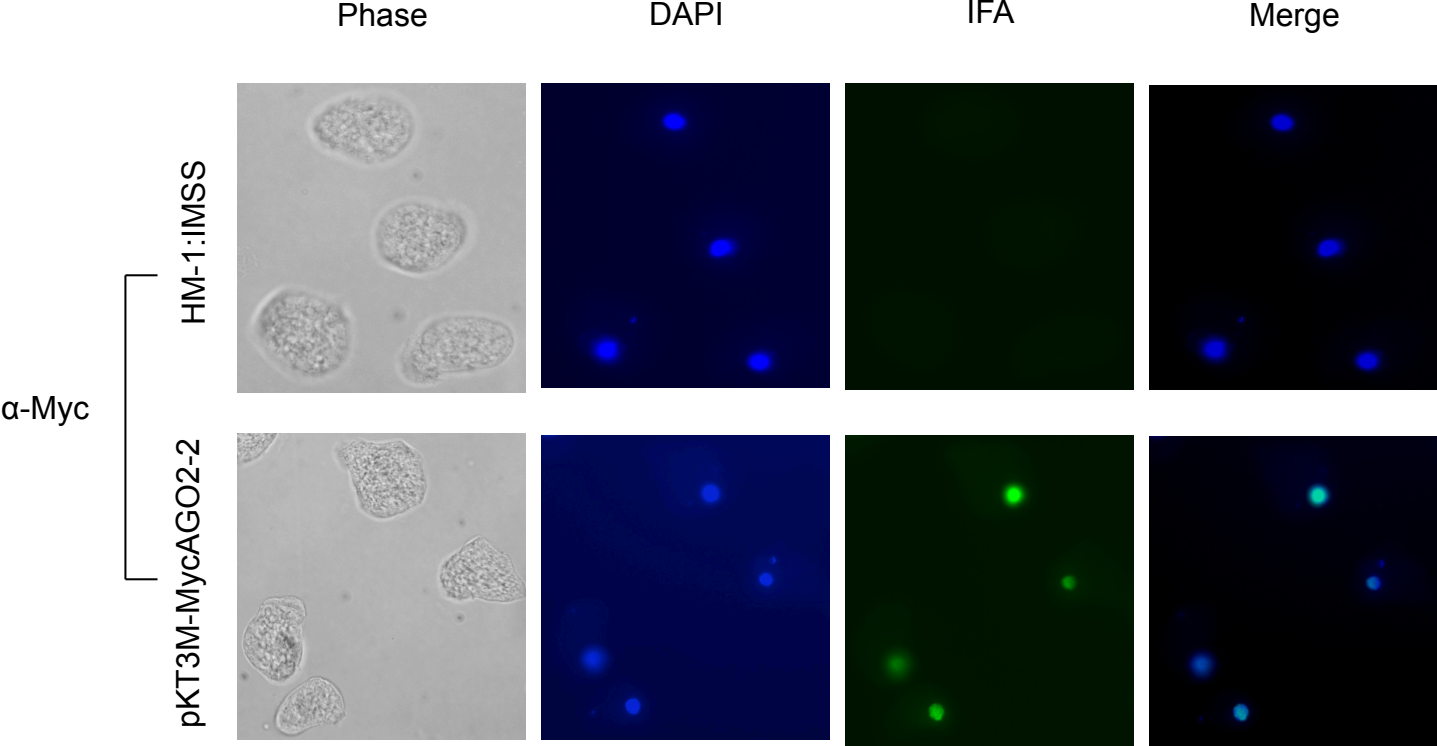

Fig. S5

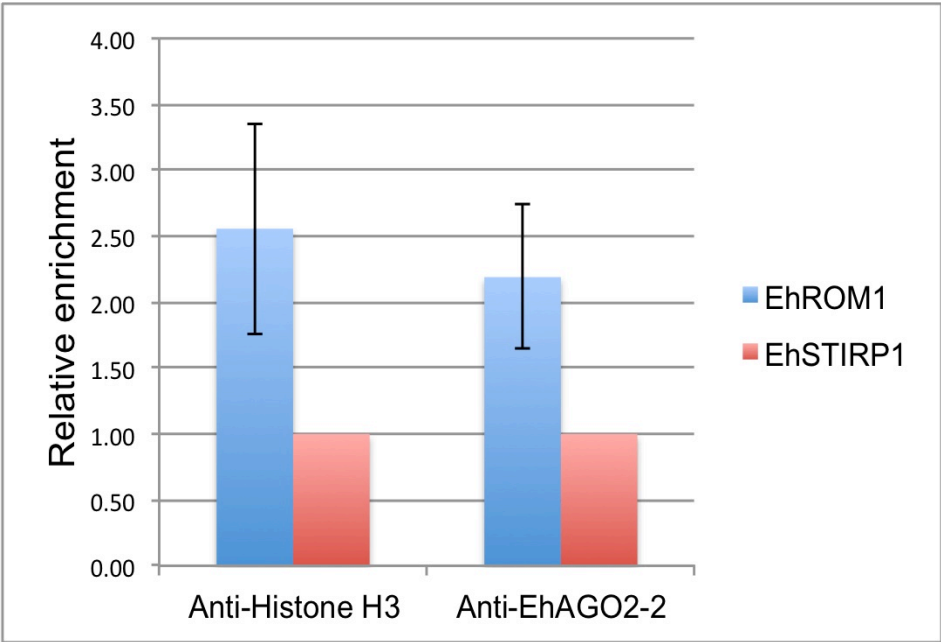

G3:ROM(KD) CHIP

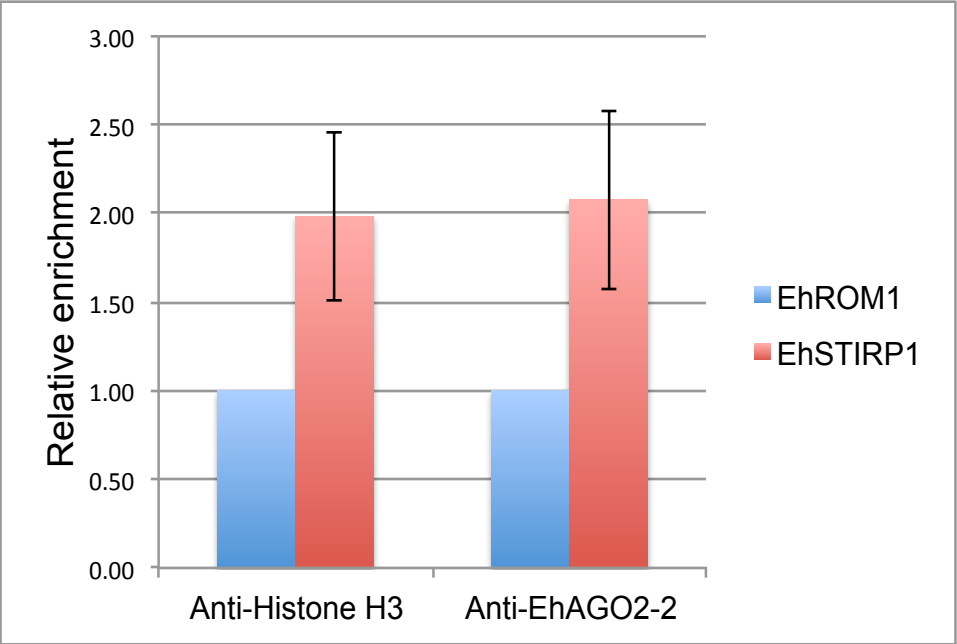

G3:5'STIRP CHIP
